# Supplementary material for: Serum miRNA-204-5p as a potential noninvasive biomarker for the diagnosis of endometrial cancer with sentinel lymph node mapping
Source: Research Square preprint supplement (doi:10.21203/rs.3.rs-403149/v1), 2021-04-20
Supplement: Supplementary file 1 [file 87786421ead52059b3cbb0de.docx]

**Table**

**Table 1:** **Association between serum miR-204-5p expression and different clinicopathological features of endometrial cancer.**

| Variable | Clinical Serum sample | |
| --- | --- | --- |
| n | miR-204-5p expression *p* value |
| Total | 52 |  |
| Age (years) |  |  |
| ≤50 | 11 | 2.53±2.38 1.86 |
| >50 | 41 | 2.67±2.24 |
| FIGO stage |  |  |
| Stage I | 37 | 2.34±2.24 0.42 |
| Stage II | 9 | 2.05±1.96 |
| Stage III | 6 | 1.82±1.78 |
| Grade (Endometrioid) |  |  |
| G1 | 27 | 2.45±2.28 0.44 |
| G2 | 18 | 2.12±2.05 |
| G3 | 7 | 1.88±1.82 |
| Myometrial invasion |  |  |
| <1/2 | 40 | 2.48±2.32 0.12 |
| ≥1/2 | 12 | 1.96±1.85 |
| Lymph node metastasis |  |  |
| negative | 47 | 2.57±2.36 <0.001 |
| positive | 5 | 0.17±0.03 |

**Table 2. Primers used for quantitative real-time PCR analysis.**

| miRNA | Primer sequence |
| --- | --- |
| miR-204-5p | Forward 5’-CCCATCGTTAAGCAATGCATGAC-3’ |
|  | Reverse 5’-GAGGGCCTCCTGATCATTTACC-3’ |
| U6 | Forward 5’-AGAGCCTGTGGTGTCCG-3’ |
|  | Reverse 5’-CATCTTCAAAGCACTTCCCT-3’ |
